# Supplementary material
Source: publisher site journal article supplement (https://www.dovepress.com/get_supplementary_file.php?f=281032.docx)
Supplement: Supplementary file 1 [file get_supplementary_file.php]

**Supplemental Table S1.** Kaplan-Meier overall survival analyses.

| **Characteristics** | **Cases**  **(n=128)** | **OS months**  **(Mean ± S.D.)** | **5-year OS**  **(%)** | **P value** |
| --- | --- | --- | --- | --- |
| **Sex** |  |  |  | 0.925 |
| Female | 46 | 55.2 ± 3.3 | 53.7% |  |
| Male | 82 | 52.7 ± 3.2 | 39.1% |  |
| **Age** |  |  |  | 0.986 |
| ≤55 yrs | 44 | 50.9 ± 3.5 | 49.5% |  |
| >55 yrs | 84 | 52.8 ± 3.0 | 42.4% |  |
| **Localization** |  |  |  | 0.169 |
| Upper 1/3 | 26 | 44.2 ± 5.3 | 38.1% |  |
| Lower 2/3 | 102 | 54.4 ± 2.6 | 47.2% |  |
| **Tumor size** |  |  |  | 0.033* |
| ≤5.0 cm | 79 | 56.8 ± 2.8 | 52.7% |  |
| >5.0 cm | 49 | 45.0 ± 3.8 | 32.7% |  |
| **T stage** |  |  |  | 0.026* |
| T1/T2 | 76 | 57.3 ± 2.9 | 55.6% |  |
| T3/T4 | 52 | 45.0 ± 3.6 | 29.7% |  |
| **Differentiation** |  |  |  | 0.089 |
| Well or moderate | 67 | 55.3 ± 2.6 | 49.8% |  |
| Poor | 61 | 49.2 ± 3.6 | 40.2% |  |
| **TNM stage** |  |  |  | <0.001* |
| Stage I-II | 80 | 58.6 ± 2.6 | 52.9% |  |
| Stage III | 48 | 41.0 ± 3.9 | 28.5% |  |
| **SPRR2B level** |  |  |  | 0.001* |
| Low | 73 | 58.6 ± 2.7 | 54.9% |  |
| High | 55 | 38.7 ± 2.7 | 18.7% |  |
